# Supplementary material
Source: Research Square preprint supplement (doi:10.21203/rs.3.rs-10293417/v1)
Supplement: Supplementary file 1 [file 64c67c10d9b9d593a4112851.docx]

**Supplemetal Material**

**Supplemental File 1:** **Retained CPF groups in the final domain-supported, species-deduplicated dataset:**

| **CPF group** | **Final retained proteins** |
| --- | --- |
| CPD/DNA photolyase | 3,880 |
| Cryptochrome-like | 758 |
| Cryptochrome DASH | 351 |
| 6–4 photolyase | 27 |
| Total | 5,016 |

**Supplemental File 2:** **Representative panel selection from the final domain-supported candidate set**

| **Family** | **Accession** | **Organism** | **Length** | **Trp** | **Aromatic W/Y/F** |
| --- | --- | --- | --- | --- | --- |
| Benchmark CPD/DNA photolyase | P00914 | *Escherichia coli* | 472 | 15 | 48 |
| CPD/DNA photolyase | A0A6M1RS91 | *Limisphaera ngatamarikiensis* | 489 | 31 | 56 |
| CPD/DNA photolyase | A0A059ZWA8 | *Acidithiobacillus caldus* | 476 | 29 | 61 |
| CPD/DNA photolyase | A0A1G7KZT4 | *Limimonas halophila* | 481 | 29 | 55 |
| Cryptochrome-like | A0A554WS62 | *Tepidimonas sediminis* | 563 | 29 | 51 |
| Cryptochrome-like | A0A554W486 | *Tepidimonas alkaliphilus* | 563 | 28 | 50 |
| Cryptochrome-like | A0A839HQR4 | *Aquariibacter albus* | 542 | 26 | 48 |
| Cryptochrome DASH | A0AA50Q7B5 | *Oceanimonas pelagia* | 447 | 24 | 57 |
| Cryptochrome DASH | A0ABU3NGL3 | *Halomonas saccharevitans* | 466 | 24 | 53 |
| Cryptochrome DASH | A0A1G9PS28 | *Franzmannia pantelleriensis* | 474 | 23 | 50 |
| 6–4 photolyase | A0A433MYC2 | *Chlorogloeopsis fritschii* | 506 | 18 | 64 |
| 6–4 photolyase | T0PFF6 | *Aeromonas salmonicida* | 506 | 18 | 59 |
| 6–4 photolyase | A0ABP9VQK1 | *Novipirellula caenicola* | 497 | 18 | 59 |

**Supplemental File 3:** **Family-matched references for structural comparison**

| **Candidate family** | **Reference protein / structure** |
| --- | --- |
| CPD/DNA photolyase | *E. coli* P00914 / 1DNP |
| Cryptochrome-like | Q9KS67 |
| Cryptochrome DASH | P77967 |
| 6–4 photolyase | A9CH39 |

**Supplemental File 4:** **Representative panel selection for the four major CPF groups**

| **Family** | **Accession** | **Organism** | **Length** | **Trp** | **Aromatic W/Y/F** |
| --- | --- | --- | --- | --- | --- |
| Benchmark CPD/DNA photolyase | P00914 | *Escherichia coli* | 472 | 15 | 48 |
| CPD/DNA photolyase | A0A6M1RS91 | *Limisphaera ngatamarikiensis* | 489 | 31 | 56 |
| CPD/DNA photolyase | A0A059ZWA8 | *Acidithiobacillus caldus* | 476 | 29 | 61 |
| CPD/DNA photolyase | A0A1G7KZT4 | *Limimonas halophila* | 481 | 29 | 55 |
| Cryptochrome-like | A0A554WS62 | *Tepidimonas sediminis* | 563 | 29 | 51 |
| Cryptochrome-like | A0A554W486 | *Tepidimonas alkaliphilus* | 563 | 28 | 50 |
| Cryptochrome-like | A0A839HQR4 | *Aquariibacter albus* | 542 | 26 | 48 |
| Cryptochrome DASH | A0AA50Q7B5 | *Oceanimonas pelagia* | 447 | 24 | 57 |
| Cryptochrome DASH | A0ABU3NGL3 | *Halomonas saccharevitans* | 466 | 24 | 53 |
| Cryptochrome DASH | A0A1G9PS28 | *Franzmannia pantelleriensis* | 474 | 23 | 50 |
| 6–4 photolyase | A0A433MYC2 | *Chlorogloeopsis fritschii* | 506 | 18 | 64 |
| 6–4 photolyase | T0PFF6 | *Aeromonas salmonicida* | 506 | 18 | 59 |
| 6–4 photolyase | A0ABP9VQK1 | *Novipirellula caenicola* | 497 | 18 | 59 |

**Supplemental File 5:** **Structural model results against reference**

| **Candidate** | **Reference** | **TM-score** | **RMSD** | **Mean pLDDT** |
| --- | --- | --- | --- | --- |
| A0A6M1RS91 | P00914 | 0.903 | 2.2 Å | 95.0 |
| A0A059ZWA8 | P00914 | 0.910 | 2.4 Å | 95.1 |
| A0A1G7KZT4 | P00914 | 0.912 | 2.3 Å | 96.1 |
| A0A554WS62 | Q9KS67 | 0.837 | 2.6 Å | 90.6 |
| A0A554W486 | Q9KS67 | 0.837 | 2.5 Å | 90.4 |
| A0A839HQR4 | Q9KS67 | 0.867 | 2.3 Å | 91.8 |
| A0AA50Q7B5 | P77967 | 0.938 | 2.1 Å | 93.2 |
| A0A1G9PS28 | P77967 | 0.906 | 2.2 Å | 94.2 |
| A0A433MYC2 | A9CH39 | 0.961 | 1.4 Å | 95.4 |
| T0PFF6 | A9CH39 | 0.956 | 1.6 Å | 96.9 |

**Supplemental File 6:** **FAD-proximal aromatic analysis**

| **Candidate** | **Family** | **Nearest Trp to FAD** | **Distance** | **Trp within 8 Å** | **Trp within 12 Å** | **Aromatics within 12 Å** |
| --- | --- | --- | --- | --- | --- | --- |
| A0A6M1RS91 | CPD/DNA photolyase | W389 | 3.976 Å | 6 | 12 | 23 |
| A0A554WS62 | Cryptochrome-like | W8 | 4.309 Å | 4 | 7 | 15 |
| A0AA50Q7B5 | Cryptochrome DASH | W380 | 2.930 Å | 4 | 10 | 26 |
| A0A433MYC2 | 6–4 photolyase | W303 | 3.314 Å | 2 | 4 | 24 |

**Supplemental File 7:** **Family-matched topology comparison for best candidate per family**

| **Candidate** | **Family** | **Family reference** | **Total W delta** | **W within 8 Å delta** | **Simple path delta** | **Trp-only path delta** | **Mixed path delta** |
| --- | --- | --- | --- | --- | --- | --- | --- |
| A0A6M1RS91 | CPD/DNA photolyase | 1DNP / P00914 | +16 | +1 | +40 | +10 | +30 |
| A0A554WS62 | Cryptochrome-like | 3ZXS | +16 | +1 | +3 | +3 | 0 |
| A0AA50Q7B5 | Cryptochrome DASH | 1NP7 | +7 | 0 | -11 | -2 | -9 |
| A0A433MYC2 | 6–4 photolyase | 3FY4 | +3 | -4 | -9 | -4 | -5 |

**Supplemental Image 1: Fully labelled version of the unrooted maximum-likelihood tree shown in Figure 2. Tip labels show accession and species name. Tips are coloured by CPF family: CPD/DNA photolyase, cryptochrome-like, cryptochrome DASH and 6–4 photolyase. The E. coli P00914 benchmark is marked with a yellow diamond, and prioritised candidates are highlighted with larger outlined markers. Branch lengths represent amino-acid substitutions per site.**

**
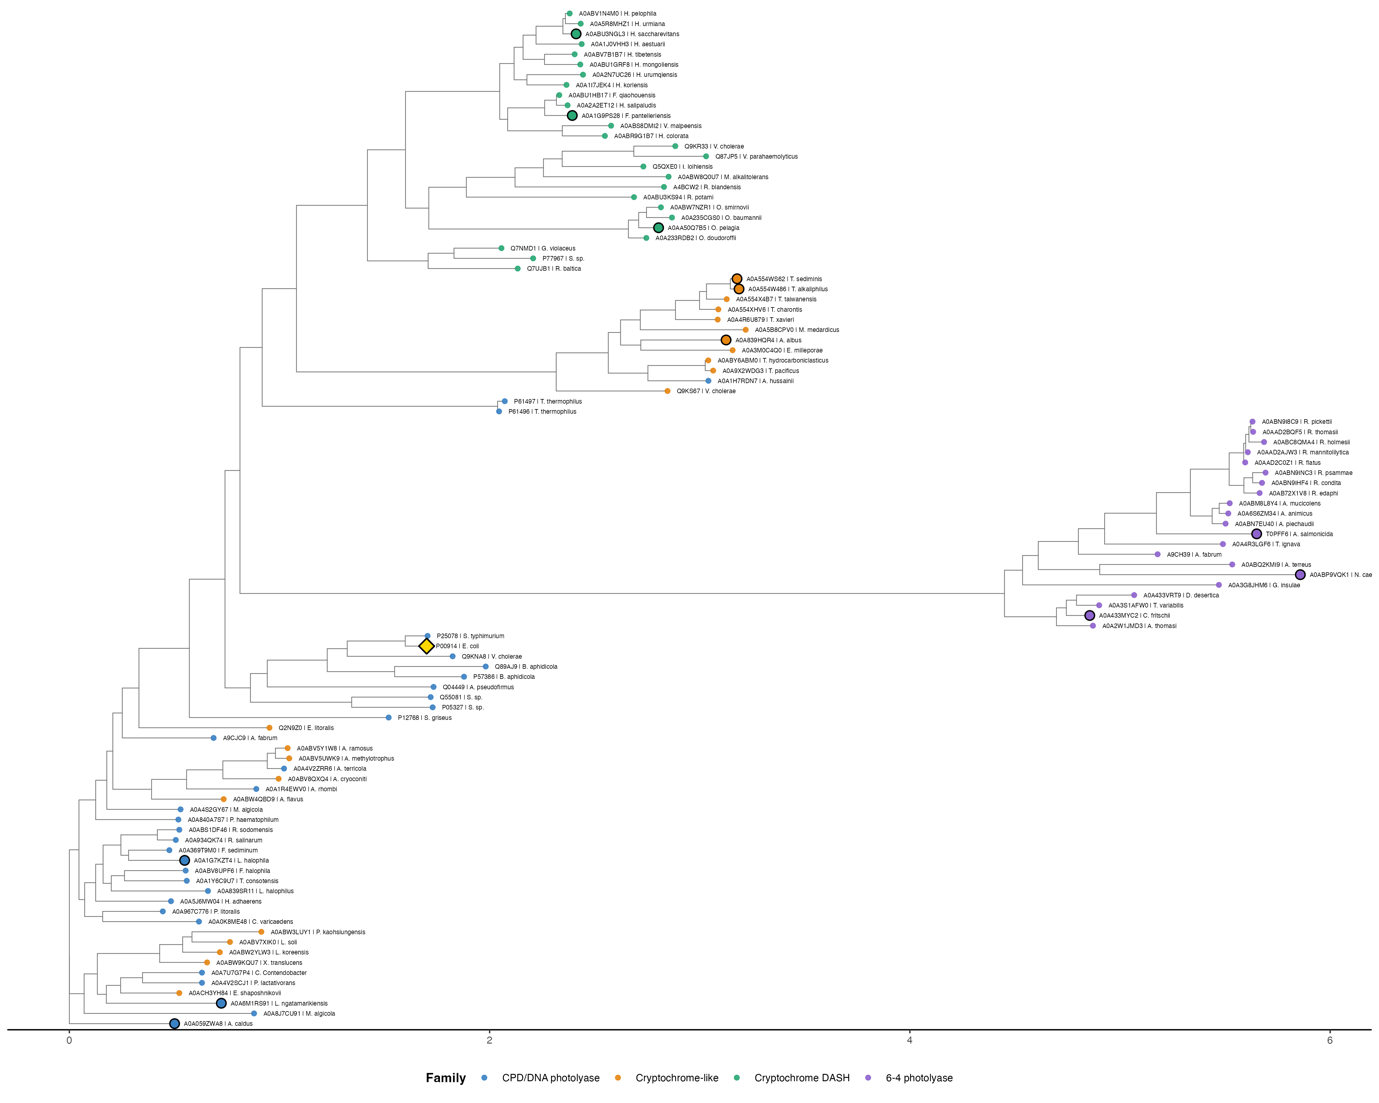
**
